# Cerebrovascular carbon dioxide reactivity in children anaesthetized with sevoflurane

D. A. Rowney\*, R. Fairgrieve and B. Bissonnette

Department of Anaesthesia, The Hospital for Sick Children, University of Toronto, Ontario, Canada, M5G 1X8

\*Corresponding author: Department of Anaesthesia, Royal Hospital for Sick Children, Sciennes Road, Edinburgh EH9 1LF, UK

**Background.** To determine the effects of sevoflurane on cerebrovascular carbon dioxide reactivity (CCO<sub>2</sub>R), middle cerebral artery blood flow velocity (CBFV) was measured at different levels of  $PE'_{CO_2}$  by transcranial Doppler sonography in 16 ASA I or II children, aged 18 months to 7 yr undergoing elective urological surgery.

**Methods.** Anaesthesia comprised 1.0 MAC sevoflurane and air in 30% oxygen delivered through an Ayre's T piece by intermittent positive-pressure ventilation, and a caudal epidural block with 0.25% bupivacaine 1.0 ml kg<sup>-1</sup> without epinephrine.  $PE'_{CO_2}$  was randomly adjusted to 25, 35, 45 and 55 mm Hg (3.3, 4.6, 5.9 and 7.2 kPa) with an exogenous source of CO<sub>2</sub>, while maintaining ventilation variables constant.

**Results.** CBFV increased as  $PE'_{CO_2}$  increased from 25 to 35, and to 45 mm Hg ( $P < 0.001$ ), but did not increase significantly with an increase in  $PE'_{CO_2}$  from 45 to 55 mm Hg. Mean heart rate and arterial pressure remained constant.

**Conclusion.** CCO<sub>2</sub>R is preserved in healthy children anaesthetized with 1.0 MAC sevoflurane.

*Br J Anaesth* 2002; **88**: 357–61

**Keywords:** anaesthesia, paediatric; anaesthetics: volatile, sevoflurane; brain, cerebral blood flow; measurement techniques, Doppler, ultrasound

Accepted for publication: November 13, 2001

The technique of controlled hyperventilation, with the consequent reduction in  $Pa_{CO_2}$ , is used during general anaesthesia to lower raised intracranial pressure caused by intracranial disease. It acts through the mechanism of cerebrovascular carbon dioxide reactivity (CCO<sub>2</sub>R) to reduce both cerebral blood flow and cerebral blood volume. It has been reported that cerebrovascular reactivity is preserved during isoflurane anaesthesia in children.<sup>1</sup> It is also preserved during sevoflurane anaesthesia in adults,<sup>2–5</sup> although CCO<sub>2</sub>R during sevoflurane anaesthesia was less than that observed during isoflurane anaesthesia in the same group.<sup>5</sup> The aim of this study was to determine the effect of varying concentrations of expired CO<sub>2</sub> on cerebral blood flow velocity (CBFV) in children during sevoflurane anaesthesia.

## Patients and methods

Following Research Ethics Board approval and written informed parental consent, 16 ASA physical status I or II,

unpremedicated children aged 18 months to 7 yr, undergoing elective urological surgery were studied. Children with neurological, pulmonary or congenital heart disease, a history of premature birth or a contraindication to regional anaesthesia were excluded.

Anaesthesia was induced with sevoflurane and air in oxygen. Rocuronium 0.6 mg kg<sup>-1</sup> was administered to facilitate tracheal intubation and the size of the uncuffed tracheal tube was chosen to allow only a minimal leak at an inspiratory pressure of 20 cm H<sub>2</sub>O. Anaesthesia was maintained with 1.0 MAC (age adjusted) sevoflurane<sup>6</sup> and air in 30% oxygen delivered through an Ayre's T piece by intermittent positive-pressure ventilation with zero end-expiratory pressure (Kion, Siemens, Sweden). Repeat doses of rocuronium were administered as required to maintain neuromuscular blockade. All patients received a caudal epidural block with 0.25% bupivacaine 1.0 ml kg<sup>-1</sup> without epinephrine. Body temperature was monitored rectally and maintained constant with a conductive water mattress and

convective air warmer under the surgical drapes. The patients were kept supine and horizontal throughout the study period. Following stabilization of maintenance anaesthesia, ventilation was adjusted to achieve a  $PE'_{CO_2}$  of 25 mm Hg (3.3 kPa). Thereafter, fresh gas flow and ventilation variables were maintained constant. The  $PE'_{CO_2}$  was randomly adjusted to 25, 35, 45 and 55 mm Hg (3.3, 4.6, 5.9 and 7.2 kPa) by the addition of  $CO_2$  to the Ayre's T piece from an exogenous source. The first and subsequent levels of  $PE'_{CO_2}$  were determined randomly until the last one was reached. The randomization was undertaken using computer-generated random number tables. Measurements were started after a 3 min stabilization period following changes in  $PE'_{CO_2}$ .

CBFV was measured by transcranial Doppler (TCD) sonography (Neuroguard, Medasonics, CA). The M1 segment of the middle cerebral artery was insonated through the temporal window with a range-gated 2 MHz Doppler probe, which was fixed to the subject's head using a special device to maintain a constant angle of insonation throughout the study period.<sup>7</sup> Additional technical specification of the TCD probe and details of Doppler analysis have been described.<sup>1</sup> Three measurements were made, at 1-min intervals, at each  $PE'_{CO_2}$ . The TCD data were recorded on a computer and subsequently analysed by one investigator who was unaware of the sequence of changes in  $PE'_{CO_2}$ . Mean CBFV was calculated as the time-averaged area under the curve of 10 consecutive Doppler tracings. Non-invasive arterial pressure, heart rate, end-tidal sevoflurane concentration, airway pressure, ventilatory frequency,  $SAO_2$  and rectal temperature were recorded at each level of  $PE'_{CO_2}$  (SC 9000XL; Siemens, Sweden). The  $CO_2$  was sampled from the tracheal tube using a 19G catheter (Intracath; Becton Dickinson, CA) and the  $CO_2$  analyser (Capnomac Ultima, Datex, USA) was calibrated with a reference gas mixture before each study patient.

### Statistical analysis

All data with parametric values are expressed as mean (SD). The number of patients needed to demonstrate a direct effect on CBFV during changes in  $PE'_{CO_2}$  was calculated with the assumption that a 20% change would be clinically relevant. Based on previous data<sup>8</sup> demonstrating a CBFV of 78 (SD 21)  $cm\ s^{-1}$  with 1.0 MAC sevoflurane at 40 mm Hg (5.3 kPa)  $PE'_{CO_2}$  in a comparable group of children, and a statistical

power of 0.8, an  $\alpha_2=0.05$  and  $\beta=0.2$ , a total of seven patients was suggested. Sixteen patients were studied to account for methodological difficulties that could have led to exclusion from the study. The relationship between  $PE'_{CO_2}$  and CBFV was obtained by non-linear regression analysis and the correlation coefficient ( $r$ ) was calculated. Parametric data were analysed by repeated-measures ANOVA and the Student–Newman–Keuls test for multiple comparisons where appropriate. A value of  $P<0.05$  was accepted as significant. The degree of relative dispersion was measured using the coefficient of variation for the CBFV data, which helps to determine the extent of the measurement effect on the results.

### Results

The mean age of the 16 children was 4 (SD 1.6) (range 1.5–7) yr and the mean weight was 16.8 (SD 4.6) (range 8.4–26) kg. Heart rate and mean arterial pressure remained constant throughout the study period (Table 1). The caudal block was successful in all cases. The TCD measurements were completed in all children, at all levels of  $PE'_{CO_2}$ , and there were no complications observed with the use of TCD sonography in this study. The CBFV increased markedly as  $PE'_{CO_2}$  was changed from 25 to 35 mm Hg (3.3 to 4.6 kPa) ( $P<0.001$ ) and from 35 to 45 mm Hg (4.6 to 5.9 kPa) ( $P<0.001$ ). However, CBFV did not increase significantly when the  $PE'_{CO_2}$  was raised from 45 to 55 mm Hg (5.9 to 7.2 kPa) (Table 1). The correlation coefficient ( $r$ ) between CBFV and  $PE'_{CO_2}$  was 0.89 (Fig. 1). The  $CCO_2R$  expressed as the percentage change in mean CBFV for a 1 mm Hg change in  $PE'_{CO_2}$  was 8.6% as  $PE'_{CO_2}$  increased from 25 to 35 mm Hg, and 5.1% from 35 to 45 mm Hg. It was only 0.8% as  $PE'_{CO_2}$  increased from 45 to 55 mm Hg (Table 2). The degree of relative dispersion measured using the coefficient of variation for the CBFV data was 8.9%.

### Discussion

The results of this study demonstrate that  $CCO_2R$  is preserved in healthy children anaesthetized with 1.0 MAC sevoflurane. Similar findings have been reported in adults anaesthetized with sevoflurane.<sup>2–5</sup>  $CO_2$  exerts a rapid and considerable influence on the cerebral circulation by dilating the cerebral arterioles and increasing cerebral blood flow. It has been postulated that this effect occurs

**Table 1** Variations in cerebral blood flow velocity (CBFV) and haemodynamic variables with increasing  $PE'_{CO_2}$  in children anaesthetized with 1.0 MAC sevoflurane. Results are expressed as mean (SD). \* $P<0.001$  with 25 mm Hg, † $P<0.001$  with 35 mm Hg.

| $PE'_{CO_2}$ (mm Hg)<br>(kPa)  | 25<br>3.3 | 35<br>4.6 | 45<br>5.9  | 55<br>7.2  |
|--------------------------------|-----------|-----------|------------|------------|
| CBFV ( $cm\ s^{-1}$ )          | 35 (7)    | 64 (16)*  | 94 (18)* † | 102 (20)*† |
| Mean arterial pressure (mm Hg) | 62 (10)   | 65 (12)   | 65 (10)    | 66 (11)    |
| Heart rate (beats $min^{-1}$ ) | 111 (10)  | 109 (9)   | 110 (9)    | 108 (9)    |

as a result of rapid diffusion of  $\text{CO}_2$  from the arterial blood into arteriolar smooth muscle causing a change in extracellular pH.<sup>9</sup> The observed  $\text{CCO}_2\text{R}$  of 8.6% with sevoflurane in the present study is considerably greater than the 2.6% with 1.0 MAC isoflurane and 1.4% with 1.0 MAC halothane reported by Leon and Bissonnette in a comparable group of children using a similar protocol.<sup>1</sup> It is also greater than the 2.1% reported by Nishiyama and colleagues with 0.7 MAC sevoflurane in adults.<sup>5</sup> Hence during sevoflurane anaesthesia in children, small changes in  $PE'_{\text{CO}_2}$  could have a clinically significant effect on cerebral blood flow and intracranial pressure. Furthermore, Nishiyama and colleagues reported that  $\text{CCO}_2\text{R}$  was greater for isoflurane than for sevoflurane in adults, but comparison of the data of the present study with that reported by Leon and Bissonnette suggests that the opposite may be true in children.<sup>15</sup>

A plateau in  $\text{CCO}_2\text{R}$  between a  $PE'_{\text{CO}_2}$  of 45 and 55 mm Hg was observed in this study, which was also observed by Leon and Bissonnette with isoflurane in

children, but has not been reported with any volatile agent in adults.<sup>1</sup> In children, unlike adults, cerebral vasodilatation seems maximal with 1.0 MAC sevoflurane above 45 mm Hg  $PE'_{\text{CO}_2}$ . Pilato and colleagues have also demonstrated this effect in a comparable group of children undergoing intravenous anaesthesia without a volatile agent.<sup>10</sup> This may suggest that the observed effect is a characteristic of the cerebral vasculature in this age group and not an effect of the volatile agent. It has been demonstrated that acute hypercapnia can reduce the capacity for cerebral autoregulation, presumably with a loss of cerebrovascular vasodilatation in response to changes in perfusion pressure.<sup>11</sup> This effect may therefore be occurring at or above the upper range of normal  $PE'_{\text{CO}_2}$  in children anaesthetized with 1.0 MAC sevoflurane.

The stability of the heart rate and mean arterial pressure throughout the study period suggests that the observed changes in CBFV were not a result of cardiovascular alteration nor were they likely to have been caused by surgical stimulation, which seems to have been successfully obtunded by the caudal epidural block. Other determinants of CBFV were also controlled.<sup>1</sup> Body temperature and depth of anaesthesia were maintained constant. Intrathoracic pressure was maintained constant by keeping the fresh gas flow rate and ventilation variables at the settings required to achieve the initial  $PE'_{\text{CO}_2}$  of 25 mm Hg throughout the study period. The  $PE'_{\text{CO}_2}$  was changed by addition of  $\text{CO}_2$  to the T piece from an exogenous source, preventing any alteration in intrathoracic pressure and cerebral venous return.

Normal CBFV changes with age, increasing rapidly from birth to approximately 18 months, followed by a relatively minimal increase up to a peak at 7 yr and thereafter declining with increasing age.<sup>12</sup> Thus CBFV in our study population, aged 18 months to 7 yr, should be relatively unaffected by age. The Doppler probe was fixed to the subject's head, using a custom-designed frame, to maintain a constant angle of insonation (i.e. the angle at which the Doppler beam impacts on the artery) throughout the study period and hence avoid inpatient errors in the calculation of CBFV.<sup>13</sup> Interpatient variability in the calculation of CBFV can result from different probe positions causing changes in the angle of insonation, which can range from 0 to 30 degrees for the middle cerebral artery.<sup>14</sup> These variations could result in a maximum measurement error of 15%.<sup>14</sup> The calculated coefficient of variation for both intra- and interpatient measurements demonstrated a relative dispersion within acceptable experimental limits. It has been shown that cerebral blood flow responds rapidly to

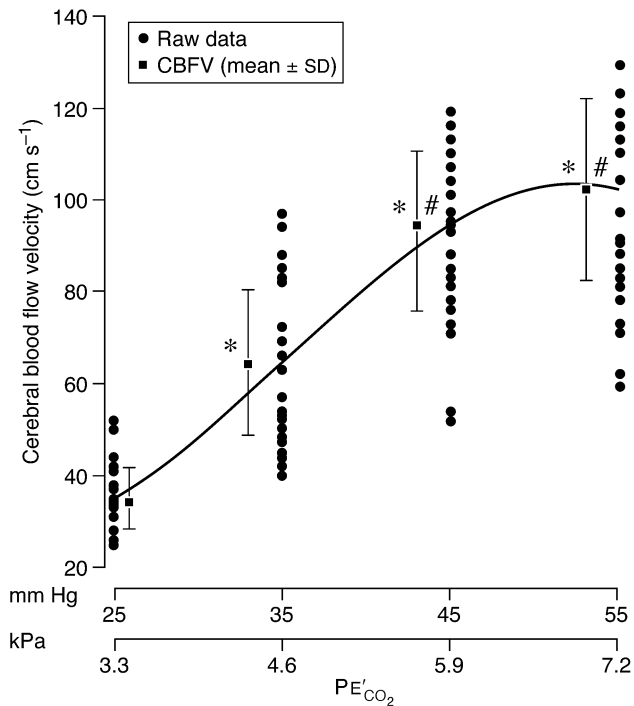

**Fig 1** Relationship between cerebral blood flow velocity (circles, raw data; squares, mean values) and  $PE'_{\text{CO}_2}$ . Non-linear regression analysis provided the best-fit line shown. The correlation coefficient ( $r$ ) is 0.89. \* $P < 0.001$  with 25 mm Hg, # $P < 0.001$  with 35 mm Hg.

**Table 2** Variations in cerebrovascular  $\text{CO}_2$  reactivity ( $\text{CCO}_2\text{R}$ ) expressed as the percentage change in mean CBFV for a 1 mm Hg change in  $PE'_{\text{CO}_2}$  with increasing  $PE'_{\text{CO}_2}$  in children anaesthetized with 1.0 MAC sevoflurane. Results are expressed as mean (SD).

| $\Delta PE'_{\text{CO}_2}$ (mm Hg)<br>(kPa) | 25–35<br>3.3–4.6 | 35–45<br>4.6–5.9 | 45–55<br>5.9–7.2 |
|---------------------------------------------|------------------|------------------|------------------|
| $\text{CCO}_2\text{R}$ (% mm Hg)            | 8.6 (2.9)        | 5.1 (3.2)        | 0.8 (0.5)        |

changes in  $P_{aCO_2}$  and reaches a plateau within 2 min.<sup>9</sup> Three min was allowed after each change in  $PE'_{CO_2}$  to achieve steady-state conditions within the brain. There was no variability between the first and third measurements at each level of  $PE'_{CO_2}$ , which allows us to assume that the steady-state conditions for  $CO_2$  were present within the basal arteries of the brain during the measurement periods. The  $PE'_{CO_2}$  was sampled from the connector of the tracheal tube to prevent any mixing effect from the fresh gas flow.<sup>15</sup> Furthermore, it has been shown that  $PE'_{CO_2}$  closely approximates to  $P_{aCO_2}$  in healthy children.<sup>16,17</sup> Young and colleagues reported that the cerebral blood flow response to changes in  $CO_2$  tension in adults can be reliably estimated from measurement of  $PE'_{CO_2}$ .<sup>18</sup> Having accounted for all the confounding factors that could affect the CBFV and the possible measurement errors, one can conclude that the observed changes in CBFV are attributable to changes in  $PE'_{CO_2}$ .

TCD sonography was used to measure the effect of changing  $PE'_{CO_2}$  on CBFV. It is a simple non-invasive and reproducible method of measuring CBFV. Relative changes in CBFV have been shown to correlate well with changes in cerebral blood flow measured by intravenous xenon<sup>133</sup> clearance ( $r=0.84$ ) and radioactive microspheres ( $r=0.94$ ).<sup>19,20</sup> In order for this to be true, the cross-sectional area of the M1 segment of the middle cerebral artery must not alter significantly with changes in arterial pressure,  $P_{aCO_2}$  or the use of anaesthetic agents. This has been verified by direct measurement during craniotomy, and using both angiography and Doppler signal power analysis.<sup>21–23</sup> Furthermore, Gillard *et al.* have demonstrated the reliability of TCD to insonate the M1 segment of the middle cerebral artery through the temporal window in the paediatric population.<sup>24</sup> TCD sonography is now widely used as a surrogate measure of cerebral blood flow.<sup>25</sup>

Sevoflurane appears to demonstrate the properties of a suitable anaesthetic agent for adult neurosurgical procedures. It causes less intrinsic cerebral vasodilatation and preserves dynamic cerebral autoregulation in response to changes in mean arterial pressure.<sup>3,4,26–28</sup> It does not seem to cause an epileptiform EEG or an increase in intracranial pressure during neurosurgery.<sup>29,30</sup> The present study shows that, with respect to  $CCO_2R$ , sevoflurane could be a suitable agent for paediatric neurosurgical procedures. We have previously shown in children that CBFV is not affected by changes in sevoflurane concentration from 0.5 to 1.5 MAC.<sup>8</sup> We have also reported that the effect on CBFV of adding nitrous oxide to sevoflurane is similar to adding it to isoflurane.<sup>31</sup> Taking account of all of these findings, we can say that sevoflurane demonstrates some of the ideal properties of an anaesthetic agent for paediatric neurosurgical procedures. However, a direct clinical comparison of sevoflurane with other anaesthetic agents

is necessary to decide which is the ideal agent for this indication.

## References

- 1 Leon JE, Bissonnette B. Cerebrovascular responses to carbon dioxide in children anaesthetized with halothane and isoflurane. *Can J Anaesth* 1991; **38**: 817–25
- 2 Nishiyama T, Sugai N, Hanaoka K. Cerebrovascular  $CO_2$  reactivity in elderly and younger adult patients during sevoflurane anaesthesia. *Can J Anaesth* 1997; **44**: 160–4
- 3 Kitaguchi K, Ohsumi H, Kuro M, *et al.* Effects of sevoflurane on cerebral circulation and metabolism in patients with ischemic cerebrovascular disease. *Anesthesiology* 1993; **79**: 704–9
- 4 Cho S, Fujigaki T, Uchiyama Y, *et al.* Effects of sevoflurane with and without nitrous oxide on human cerebral circulation. Transcranial Doppler study. *Anesthesiology* 1996; **85**: 755–60
- 5 Nishiyama T, Matsukawa T, Yokoyama T, *et al.* Cerebrovascular carbon dioxide reactivity during general anesthesia: a comparison between sevoflurane and isoflurane. *Anesth Analg* 1999; **89**: 1437–41
- 6 Mapleson WW. Effect of age on MAC in humans: a meta-analysis. *Br J Anaesth* 1996; **76**: 179–85
- 7 Bissonnette B, Benson LN. Closure of persistently patent arterial duct and its impact on cerebral circulatory haemodynamics in children. *Can J Anaesth* 1998; **45**: 199–205
- 8 Fairgrieve R, Rowney DA, Bissonnette B. Effects of sevoflurane on cerebral blood flow velocity. *Anesthesiology* 2000; **93**: A1305
- 9 Severinghaus JW, Lassen N. Step hypocapnia to separate arterial from tissue  $PCO_2$  in the regulation of cerebral blood flow. *Circ Res* 1967; **20**: 272–8
- 10 Pilato MA, Bissonnette B, Lerman J. Transcranial Doppler: response of cerebral blood-flow velocity to carbon dioxide in anaesthetized children. *Can J Anaesth* 1991; **38**: 37–42
- 11 Raichle ME, Stone HL. Cerebral blood flow autoregulation and graded hypercapnia. *Eur Neurol* 1971; **6**: 1–5
- 12 Bode H. Methods: Recording technique. In: Bode H, ed. *Paediatric Applications of Transcranial Doppler Sonography*. New York: Springer-Verlag, 1988; 21–2
- 13 Winkler P, Helmke K. Major pitfalls in Doppler investigations with particular reference to the cerebral vascular system. Part I. Sources of error, resulting pitfalls and measures to prevent errors. *Pediatr Radiol* 1990; **20**: 219–28
- 14 Aaslid R. Cerebral haemodynamics. In: Aaslid R, ed. *Transcranial Doppler Sonography*. New York: Springer-Verlag, 1986; 60–5
- 15 Halpern L, Bissonnette B. The most proximal and accurate site for sampling end-tidal  $CO_2$  in infants. *Can J Anaesth* 1994; **41**: 984–90
- 16 Badgwell JM, McLeod ME, Lerman J, *et al.* End-tidal  $PCO_2$  measurements sampled at the distal and proximal ends of the endotracheal tube in infants and children. *Anesth Analg* 1987; **66**: 959–64
- 17 Bissonnette B, Lerman J. Single breath end-tidal  $CO_2$  estimates of arterial  $PCO_2$  in infants and children. *Can J Anaesth* 1989; **36**: 110–2
- 18 Young WL, Prohovnik I, Ornstein E, *et al.* Cerebral blood flow reactivity to changes in carbon dioxide calculated using end-tidal versus arterial tensions. *J Cereb Blood Flow Metab* 1991; **11**: 1031–5
- 19 Bishop CC, Powell S, Rutt D, *et al.* Transcranial Doppler measurement of middle cerebral artery blood flow velocity: a validation study. *Stroke* 1986; **17**: 913–5
- 20 Kochs E, Hoffman WE, Werner C, *et al.* Cerebral blood flow

- velocity in relation to cerebral blood flow, cerebral metabolic rate for oxygen, and electroencephalogram analysis during isoflurane anesthesia in dogs. *Anesth Analg* 1993; **76**: 1222–6
- 21 Giller CA, Bowman G, Dyer H, et al. Cerebral arterial diameters during changes in blood pressure and carbon dioxide during craniotomy. *Neurosurgery* 1993; **32**: 737–41; discussion 41–2
  - 22 Huber P, Handa J. Effect of contrast material, hypercapnia, hyperventilation, hypertonic glucose and papaverine on the diameter of the cerebral arteries. Angiographic determination in man. *Invest Radiol* 1967; **2**: 17–32
  - 23 Poulin MJ, Robbins PA. Indexes of flow and cross-sectional area of the middle cerebral artery using Doppler ultrasound during hypoxia and hypercapnia in humans. *Stroke* 1996; **27**: 2244–50
  - 24 Gillard JH, Kirkham FJ, Levin SD, et al. Anatomical validation of middle cerebral artery position as identified by transcranial pulsed Doppler ultrasound. *J Neurol Neurosurg Psychiatry* 1986; **49**: 1025–9
  - 25 Sudikoff S, Banasiak K. Techniques for measuring cerebral blood flow in children. *Curr Opin Pediatr* 1998; **10**: 291–8
  - 26 Matta BF, Heath KJ, Tipping K, et al. Direct cerebral vasodilatory effects of sevoflurane and isoflurane. *Anesthesiology* 1999; **91**: 677–80
  - 27 Summors AC, Gupta AK, Matta BF. Dynamic cerebral autoregulation during sevoflurane anesthesia: a comparison with isoflurane. *Anesth Analg* 1999; **88**: 341–5
  - 28 Gupta S, Heath K, Matta BF. Effect of incremental doses of sevoflurane on cerebral pressure autoregulation in humans. *Br J Anaesth* 1997; **79**: 469–72
  - 29 Bundgaard H, von Oettingen G, Larsen KM, et al. Effects of sevoflurane on intracranial pressure, cerebral blood flow and cerebral metabolism. A dose-response study in patients subjected to craniotomy for cerebral tumours. *Acta Anaesthesiol Scand* 1998; **42**: 621–7
  - 30 Artru AA, Lam AM, Johnson JO, et al. Intracranial pressure, middle cerebral artery flow velocity, and plasma inorganic fluoride concentrations in neurosurgical patients receiving sevoflurane or isoflurane. *Anesth Analg* 1997; **85**: 587–92
  - 31 Fairgrieve R, Rowney DA, Bissonnette B. Effect of nitrous oxide on cerebral blood flow velocity in children anesthetised with sevoflurane. *Anesthesiology* 2000; **93**: A1285
